# Supplementary material for: Tracing the sources and depositional history of mercury to coastal northeastern U.S. lakes
Source: Royal Society of Chemistry journal article supplement (doi:10.1039/d2em00214k), 2022-01-01
Supplement: d2em00214k1.pdf [file d2em00214k1.pdf]

## Supporting Information “Tracing the sources and depositional history of mercury to coastal Eastern U.S. lakes”

Vivien F. Taylor<sup>1</sup>, Joshua D. Landis<sup>1</sup>, Sarah E. Janssen<sup>2</sup>

<sup>1</sup>Department of Earth Science, 6105 Fairchild Hall, Dartmouth College, Hanover, NH 03755

<sup>2</sup>U.S. Geological Survey Upper Midwest Water Science Center, Mercury Research Lab, 1 Gifford Pinchot Dr, Madison, WI 53726

### Supplemental Methods: age model and mass accumulation rate.

The Constant Rate of Supply (CRS) model is derived explicitly from closed-system radiodecay law, appearing as follows<sup>1,2</sup>:

$$t = \lambda^{-1} \cdot \ln \left( \frac{\sum_{\infty}^0 Pb}{\sum_{\infty}^i Pb} \right) \quad \text{Eq. 1}$$

Here  $\sum_{\infty}^0 Pb$  is the total <sup>210</sup>Pb inventory [Bq m<sup>-2</sup>] summed for all sediment layers from the sediment surface (0) to bottom ( $\infty$ ), and  $\sum_{\infty}^i Pb$  is summed for all layers below the *i*<sup>th</sup> layer to be dated. Each layer inventory is calculated as the measured concentration [Bq kg<sup>-1</sup>] multiplied by total sediment mass collected for that layer per core cross-sectional area [kg m<sup>-2</sup>]. The age of the *i*<sup>th</sup> layer is given as *t*, and because of the summation this corresponds to the age of the lower layer boundary. The mean age of the layer is thus the average of upper and lower boundary ages.

The Linked Radionuclide aCcumulation (LRC) model is derived from open-system radiodecay law and implemented by a least-squares solution that minimizes the differences between *R<sub>acc</sub>* and *R<sub>exp</sub>* according to Eq. 2.<sup>3</sup>

$$R_{acc} = \frac{\sum_i^0 Be}{\sum_i^0 Pb} \approx R_{exp} = R_D \frac{\lambda_{Pb} 1 - e^{-\lambda_{Be} t}}{\lambda_{Be} 1 - e^{-\lambda_{Pb} t}} \quad \text{Eq. 2}$$

*R<sub>acc</sub>* is the measured accumulative <sup>7</sup>Be:<sup>210</sup>Pb ratio, which for each *i*<sup>th</sup> sediment layer is summed for that layer (lower boundary) through all overlying layers to the sediment surface (0). The ratio

is thus summed from the bottom up, contrasting to the CRS model which is summed top-down.  $R_{exp}$  is the experimental ratio calculated as the quotient of  $^7\text{Be}$  and  $^{210}\text{Pb}$  inventories. The ratio  $R_D$  is the empirical flux ratio, which is calculated from the total measured  $^7\text{Be}$  and  $^{210}\text{Pb}$  inventories for the core, where flux ( $D$ ) =  $\lambda A$  and  $A$  is total inventory and  $\lambda$  is the corresponding radioactive decay constant.  $t$  is the layer age, but in contrast to the CRS model  $t$  appears twice and thus precludes an analytical solution to Eq. 2 and is thus solved as unknown using least-squares minimization. As for the CRS model, the LRC is implemented by a summation process and the average layer age is calculated as the average of the upper and lower boundary ages.

For the CRS model, the mass sedimentation rate ( $r$ ) is derived explicitly from Eq. 2 and implemented as described by Binford et al. (1990), where  $A$  is the inventory below the layer and  $C$  is the concentration for that layer:

$$r = \lambda^{Pb} \cdot A \cdot C^{-1} \quad \text{Eq. 3}$$

This is approximated (within 1%) as the mass of the interval divided by the difference of upper and lower boundary ages:

$$r = \frac{m}{age_{bottom} - age_{top}} \quad \text{Eq. 4}$$

For the LRC model sedimentation is calculated following Eq. 4 because no analytical solution is available.

Disclaimer: Any use of trade, firm, or product names is for descriptive purposes only and does not imply endorsement by the U.S. Government.

**Table 1S:** Geographic coordinates, lake and watershed land area and ratio, and attributes of the lakes sampled in this study.

| Site | Lake                        | Location<br>(latitude,<br>longitude) | Lake<br>area<br>(hectares) | Land<br>area<br>(hectares) | Watershed:<br>Lake ratio | Elevation<br>(meters<br>above<br>sea level) | Depth<br>(meters) | Distance to<br>ocean<br>(kilometers) |
|------|-----------------------------|--------------------------------------|----------------------------|----------------------------|--------------------------|---------------------------------------------|-------------------|--------------------------------------|
| ANP  | Sargent<br>Mountain<br>Pond | 44°20.069'N,<br>68°16.185'W          | 0.6                        | 2.1                        | 3.6                      | 336                                         | 3.5               | 5.3                                  |
| ANP  | The Bowl                    | 44°20.242'N,<br>68°11.591'W          | 4.5                        | 22.9                       | 5.1                      | 126                                         | 6                 | 1.4                                  |
| CCNS | Long Pond                   | 41°56.312'N,<br>70°0.578'W           | 15.3                       | 28.9                       | 1.9                      | 1                                           | 15                | 2.1                                  |
| CCNS | Dyer Pond                   | 41°56.637'N,<br>70°0.541'W           | 4.9                        | 13.4                       | 2.7                      | 2                                           | 10                | 1.4                                  |

**Table 2S is attached as a separate document:** Cumulative mass depth, percent loss on ignition (%LOI), radionuclide (lead-210 [ $^{210}\text{Pb}$ ], beryllium-7 [ $^7\text{Be}$ ], cesium-137 [ $^{137}\text{Cs}$ ], americium-241 [ $^{241}\text{Am}$ ]) and mercury (Hg) and lead (Pb) concentrations in sections of sediment cores from Sargent Mountain Pond and The Bowl (Acadia National Park, ANS), and Long Pond and Dyer Pond (Cape Cod National Seashore, CCNS). Calculated sediment ages by the Linked Radionuclide aCcumulation (LRC) and Constant Rate of Supply (CRS) model are also given, along with Hg and Pb flux derived from sedimentation rates for LRC and CRS ages.

**Table 3S:** Quality assurance and control for standard reference materials analyzed for stable Hg isotopes. 2SD is twice the standard deviation. Standard reference materials are as follows: UM-Almaden (National Institute of Standards and Technology (NIST) SRM 8610), secondary standard for mercury (Hg) isotope analyses; MESS-4 (National Research Council Canada), marine sediment; and NIST 1944, estuarine sediment.

| Standard        | <i>n</i> | $\delta^{202}\text{Hg}$<br>Ave.<br>(‰) | $\delta^{202}\text{Hg}$<br>2SD<br>(‰) | $\Delta^{199}\text{Hg}$<br>Ave.<br>(‰) | $\Delta^{199}\text{Hg}$<br>2SD<br>(‰) | $\Delta^{200}\text{Hg}$<br>Ave.<br>(‰) | $\Delta^{200}\text{Hg}$<br>2SD<br>(‰) | $\Delta^{201}\text{Hg}$<br>Ave.<br>(‰) | $\Delta^{201}\text{Hg}$<br>2SD<br>(‰) | $\Delta^{204}\text{Hg}$<br>Ave.<br>(‰) | $\Delta^{204}\text{Hg}$<br>2SD<br>(‰) |
|-----------------|----------|----------------------------------------|---------------------------------------|----------------------------------------|---------------------------------------|----------------------------------------|---------------------------------------|----------------------------------------|---------------------------------------|----------------------------------------|---------------------------------------|
| UM-Almaden NRCC | 20       | -0.54                                  | 0.07                                  | -0.02                                  | 0.05                                  | 0.01                                   | 0.05                                  | -0.03                                  | 0.05                                  | -0.01                                  | 0.12                                  |
| MESS-4          | 2        | -2.00                                  | 0.08                                  | -0.01                                  | 0.06                                  | -0.02                                  | 0.05                                  | -0.04                                  | 0.05                                  | 0.03                                   | 0.10                                  |
| NIST 1944       | 3        | -0.41                                  | 0.08                                  | -0.01                                  | 0.03                                  | 0.00                                   | 0.01                                  | -0.02                                  | 0.07                                  | -0.02                                  | 0.09                                  |

**Table 4S:** Hg isotope ratio data for sediment core sections from Sargent Mountain Pond, Acadia National Park (ANP) and Long Pond, Cape Cod National Seashore (CCNS).

| Core    | Depth<br>(cm) | Calendar<br>Age | $\delta^{202}\text{Hg}$<br>(‰) | $\Delta^{199}\text{Hg}$<br>(‰) | $\Delta^{200}\text{Hg}$<br>(‰) | $\Delta^{201}\text{Hg}$<br>(‰) | $\Delta^{204}\text{Hg}$<br>(‰) |
|---------|---------------|-----------------|--------------------------------|--------------------------------|--------------------------------|--------------------------------|--------------------------------|
| Sargent | 0-0.5         | 2016            | -1.18                          | -0.15                          | 0.08                           | -0.20                          | -0.11                          |
| Sargent | 1-1.5         | 2008            | -1.05                          | -0.14                          | 0.11                           | -0.24                          | -0.18                          |
| Sargent | 2-2.5         | 2001            | -1.06                          | -0.17                          | 0.08                           | -0.23                          | -0.12                          |
| Sargent | 3-3.5         | 1993            | -0.96                          | -0.12                          | 0.11                           | -0.20                          | -0.16                          |
| Sargent | 4-4.5         | 1983            | -1.01                          | -0.20                          | 0.08                           | -0.25                          | -0.15                          |
| Sargent | 5-5.5         | 1973            | -0.99                          | -0.15                          | 0.10                           | -0.16                          | -0.15                          |
| Sargent | 6-6.5         | 1961            | -0.99                          | -0.12                          | 0.06                           | -0.15                          | -0.18                          |
| Sargent | 7-7.5         | 1948            | -1.01                          | -0.07                          | 0.09                           | -0.13                          | -0.17                          |
| Sargent | 8-8.5         | 1933            | -1.00                          | -0.04                          | 0.07                           | -0.14                          | -0.19                          |
| Sargent | 9-9.5         | 1919            | -1.07                          | -0.09                          | 0.04                           | -0.14                          | -0.14                          |
| Sargent | 10-11         | 1902            | -1.26                          | -0.12                          | 0.06                           | -0.18                          | -0.04                          |
| Sargent | 12-13         | 1863            | -1.46                          | -0.33                          | 0.04                           | -0.42                          | -0.05                          |
| Sargent | 14-15         | 1825            | -1.73                          | -0.49                          | 0.02                           | -0.53                          | 0.00                           |
| Sargent | 16-17         | 1772            | -1.83                          | -0.50                          | 0.03                           | -0.48                          | -0.03                          |
| Sargent | 18-19         | 1732            | -1.75                          | -0.48                          | -0.01                          | -0.51                          | -0.13                          |
| Long    | 0-0.5         | 2019            | -0.29                          | -0.10                          | 0.07                           | -0.18                          | -0.10                          |
| Long    | 1-1.5         | 2015            | -0.35                          | -0.07                          | 0.05                           | -0.17                          | -0.07                          |
| Long    | 2-2.5         | 2008            | -0.44                          | -0.10                          | 0.09                           | -0.12                          | -0.02                          |
| Long    | 3-3.5         | 2000            | -0.42                          | -0.08                          | 0.10                           | -0.11                          | -0.07                          |
| Long    | 4-4.5         | 1989            | -0.39                          | -0.05                          | 0.05                           | -0.17                          | -0.14                          |
| Long    | 5-5.5         | 1978            | -0.43                          | -0.06                          | 0.05                           | -0.13                          | 0.00                           |
| Long    | 6-6.5         | 1967            | -0.38                          | -0.04                          | 0.07                           | -0.09                          | -0.10                          |
| Long    | 7-7.5         | 1956            | -0.41                          | -0.04                          | 0.07                           | -0.11                          | -0.07                          |
| Long    | 8-9           | 1946            | -0.52                          | -0.01                          | 0.02                           | -0.16                          | -0.09                          |
| Long    | 9-10          | 1938            | -0.69                          | 0.00                           | 0.03                           | -0.20                          | -0.11                          |
| Long    | 10-11         | 1931            | -0.78                          | -0.03                          | 0.06                           | -0.22                          | -0.08                          |
| Long    | 12-13         | 1920            | -0.92                          | 0.01                           | 0.04                           | -0.18                          | -0.06                          |
| Long    | 14-15         | 1904            | -0.81                          | -0.02                          | 0.08                           | -0.12                          | -0.04                          |
| Long    | 16-17         | 1893            | -0.78                          | 0.00                           | 0.09                           | -0.14                          | -0.02                          |
| Long    | 18-19         | 1874            | -0.69                          | 0.04                           | 0.08                           | -0.09                          | -0.08                          |
| Long    | 20-25         | 1842            | -0.57                          | -0.02                          | 0.05                           | -0.23                          | -0.12                          |
| Long    | 25-27         | 1814            | -0.74                          | -0.02                          | 0.05                           | -0.24                          | -0.08                          |

**Table 5S:** Lead (Pb) isotope ratio data for sediment core sections from Sargent Mountain Pond, Acadia National Park (ANP) and Long Pond, Cape Cod National Seashore (CCNS).

| <b>Sample Name</b> | <b>Depth<br/>(cm)</b> | <b>Calendar<br/>Age</b> | <b><math>^{206}\text{Pb}/^{207}\text{Pb}</math></b> |
|--------------------|-----------------------|-------------------------|-----------------------------------------------------|
| Sargent            | 0-0.5                 | 2016                    | 1.198                                               |
| Sargent            | 0.5-1                 | 2011                    | 1.200                                               |
| Sargent            | 1-1.5                 | 2008                    | 1.194                                               |
| Sargent            | 1.5-2                 | 2005                    | 1.200                                               |
| Sargent            | 2-2.5                 | 2001                    | 1.200                                               |
| Sargent            | 2.5-3                 | 1997                    | 1.201                                               |
| Sargent            | 3-3.5                 | 1993                    | 1.200                                               |
| Sargent            | 3.5-4                 | 1988                    | 1.203                                               |
| Sargent            | 4-4.5                 | 1983                    | 1.204                                               |
| Sargent            | 4.5-5                 | 1978                    | 1.201                                               |
| Sargent            | 5-5.5                 | 1973                    | 1.201                                               |
| Sargent            | 5.5-6                 | 1968                    | 1.197                                               |
| Sargent            | 6-6.5                 | 1961                    | 1.195                                               |
| Sargent            | 6.5-7                 | 1955                    | 1.195                                               |
| Sargent            | 7-7.5                 | 1948                    | 1.198                                               |
| Sargent            | 7.5-8                 | 1941                    | 1.199                                               |
| Sargent            | 8-8.5                 | 1933                    | 1.200                                               |
| Sargent            | 8-5.9                 | 1926                    | 1.200                                               |
| Sargent            | 9-9.5                 | 1919                    | 1.202                                               |
| Sargent            | 9.5-10                | 1912                    | 1.209                                               |
| Sargent            | 10-11                 | 1902                    | 1.220                                               |
| Sargent            | 11-12                 | 1882                    | 1.233                                               |
| Sargent            | 12-13                 | 1863                    | 1.246                                               |
| Sargent            | 13-14                 | 1842                    | 1.225                                               |
| Sargent            | 14-15                 | 1825                    | 1.223                                               |
| Sargent            | 15-16                 | 1799                    | 1.223                                               |
| Sargent            | 16-17                 | 1772                    | 1.224                                               |
| Long               | 0-0.5                 | 2019                    | 1.212                                               |
| Long               | 0.5-1                 | 2018                    | 1.209                                               |
| Long               | 1-1.5                 | 2015                    | 1.210                                               |
| Long               | 1.5-2                 | 2012                    | 1.210                                               |
| Long               | 2-2.5                 | 2008                    | 1.210                                               |
| Long               | 2.5-3                 | 2004                    | 1.210                                               |
| Long               | 3-3.5                 | 2000                    | 1.210                                               |
| Long               | 3.5-4                 | 1995                    | 1.209                                               |
| Long               | 4-4.5                 | 1989                    | 1.210                                               |
| Long               | 4.5-5                 | 1983                    | 1.211                                               |

|      |       |      |       |
|------|-------|------|-------|
| Long | 5-5.5 | 1978 | 1.213 |
| Long | 5.5-6 | 1972 | 1.210 |
| Long | 6-6.5 | 1967 | 1.210 |
| Long | 6.5-7 | 1961 | 1.218 |
| Long | 7.5-8 | 1956 | 1.222 |
| Long | 9-10  | 1946 | 1.227 |
| Long | 10-11 | 1938 | 1.227 |
| Long | 11-12 | 1931 | 1.222 |
| Long | 12-13 | 1925 | 1.218 |
| Long | 13-14 | 1914 | 1.219 |
| Long | 14-15 | 1904 | 1.217 |
| Long | 15-16 | 1897 | 1.215 |
| Long | 16-17 | 1893 | 1.216 |
| Long | 17-18 | 1884 | 1.223 |
| Long | 18-19 | 1874 | 1.230 |
| Long | 19-20 | 1866 | 1.223 |
| Long | 20-25 | 1842 | 1.219 |
| Long | 25-30 | 1814 | 1.215 |

**Figure 1S:** Location of sampling sites: Acadia National Park (ANP) and Cape Cod National Seashore (CCNS), and Hg emissions (kg yr<sup>-1</sup>) in the northeastern region of the United States,<sup>4</sup> scaled by to represent the magnitude of annual emissions from each source.

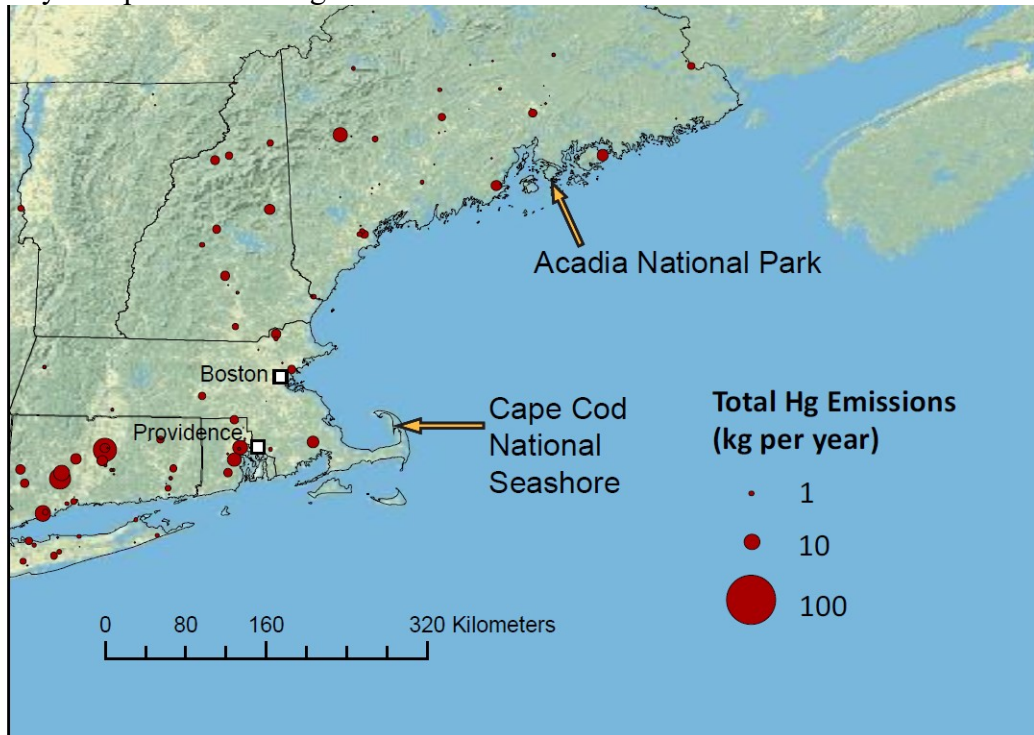



**Figure 3S:** Mass accumulation rates estimated from the Constant Rate of Supply (CRS) and Linked Radionuclide aCcumulation (LRC) age models.

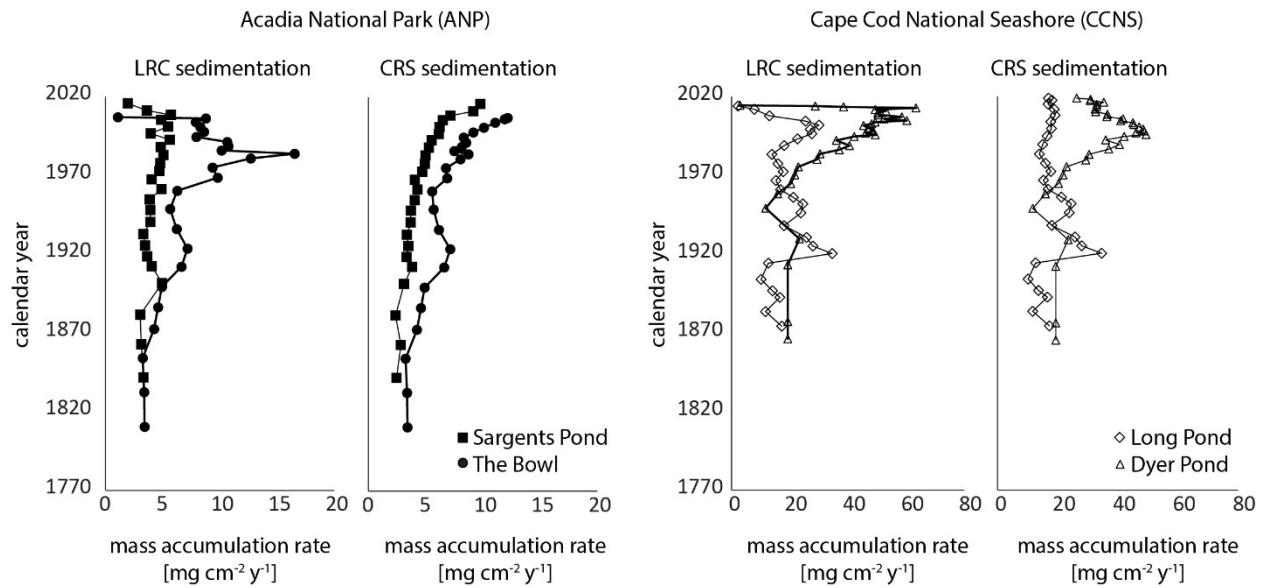

**Figure 4S** Concentrations and flux rates of Hg and Pb vs. calendar year based on the LRC model for a) Sargent Mountain Pond, ANP; b) The Bowl, ANP; c) Long Pond, CCNS; and d) Dyer Pond, CCNS; and concentrations and flux rates of Hg and Pb vs. calendar year based on the CRS model for e) Sargent Mountain Pond, ANP; f) The Bowl, ANP; g) Long Pond, CCNS; and h) Dyer Pond, CCNS. Dotted lines mark 1850 and 1990, defined here as the beginnings of the industrial and modern eras.

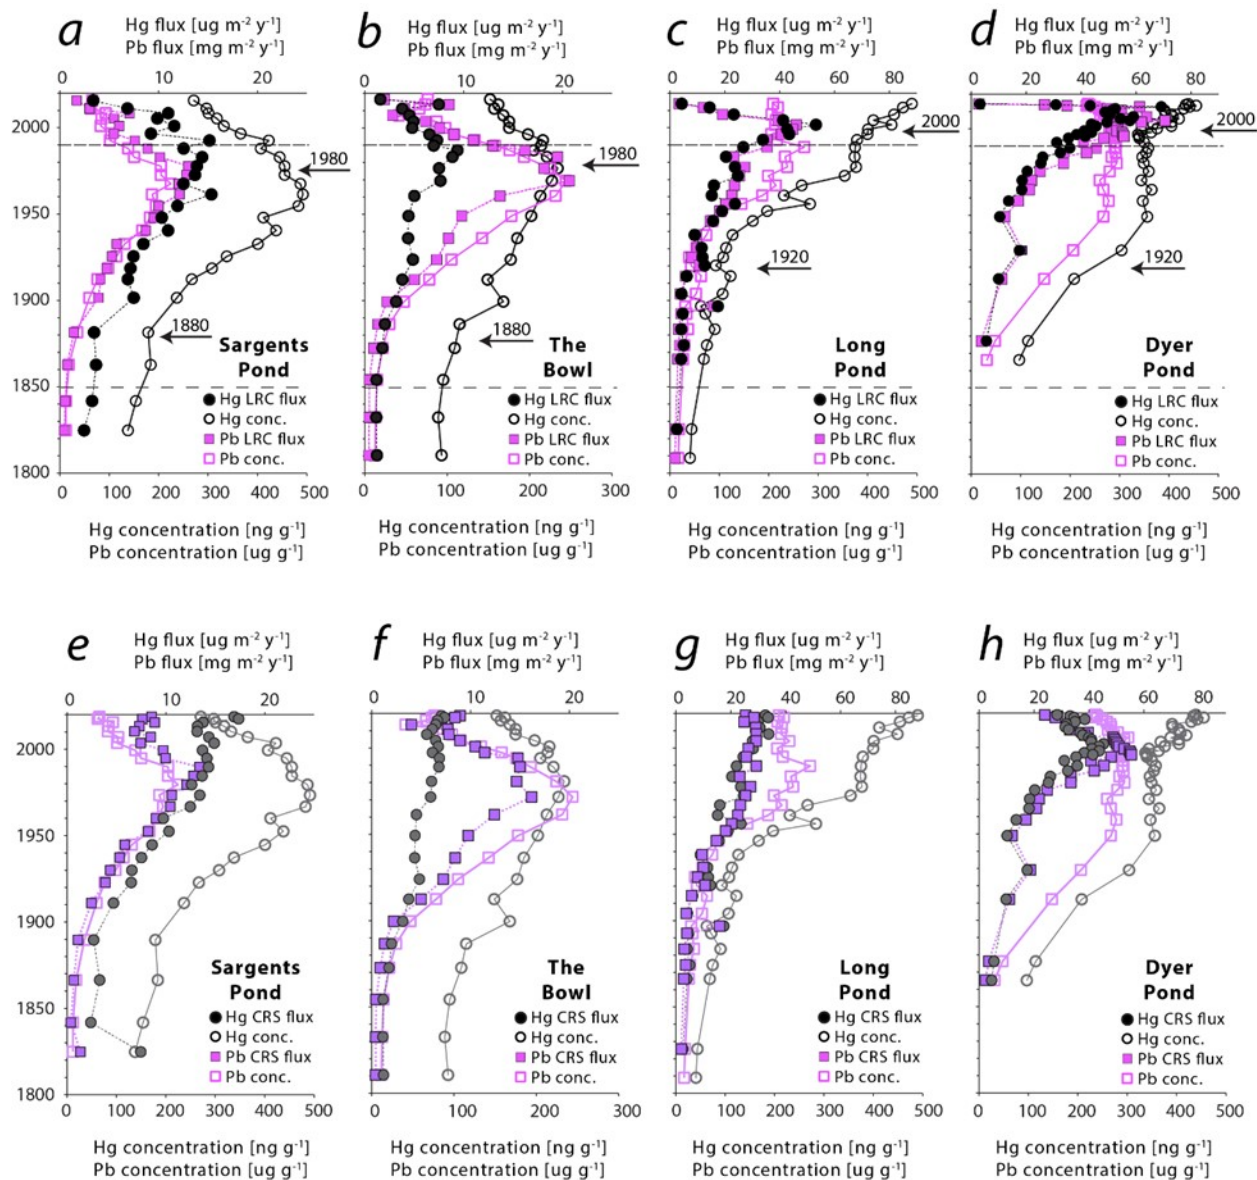

**Figure 5S.** Hg flux via precipitation from Mercury Deposition Network (MDN) data collected at ANP (Site ME98, blue circles) and CCNS (Site MA01, orange circles). Coefficients of determination ( $R^2$ ) are calculated for each site. Data were accessed from the National Atmospheric Deposition Program data repository (<https://nadp.slh.wisc.edu/networks/mercury-deposition-network/>).

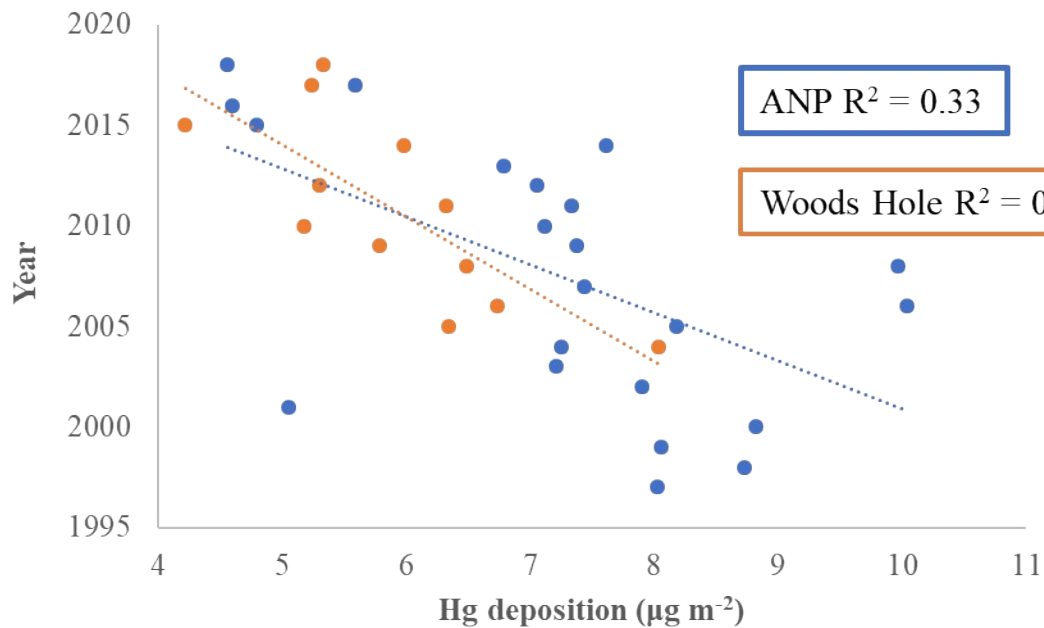

**Figure 6S** Two endmember mixing plots of  $\delta^{202}\text{Hg}$  and  $\Delta^{199}\text{Hg}$  vs.  $1/\text{total Hg (THg)}$  for Sargent Mountain Pond, Acadia National Park (ANP) (blue circles) and Long Pond, Cape Cod National Seashore (CCNS) (orange circles). Open circles denote pre-1850 sediment and closed circles denote post-1850 sediment. Dotted trendlines represent a significant correlation. Brackets show uncertainty in isotope values ( $2\sigma$ ).

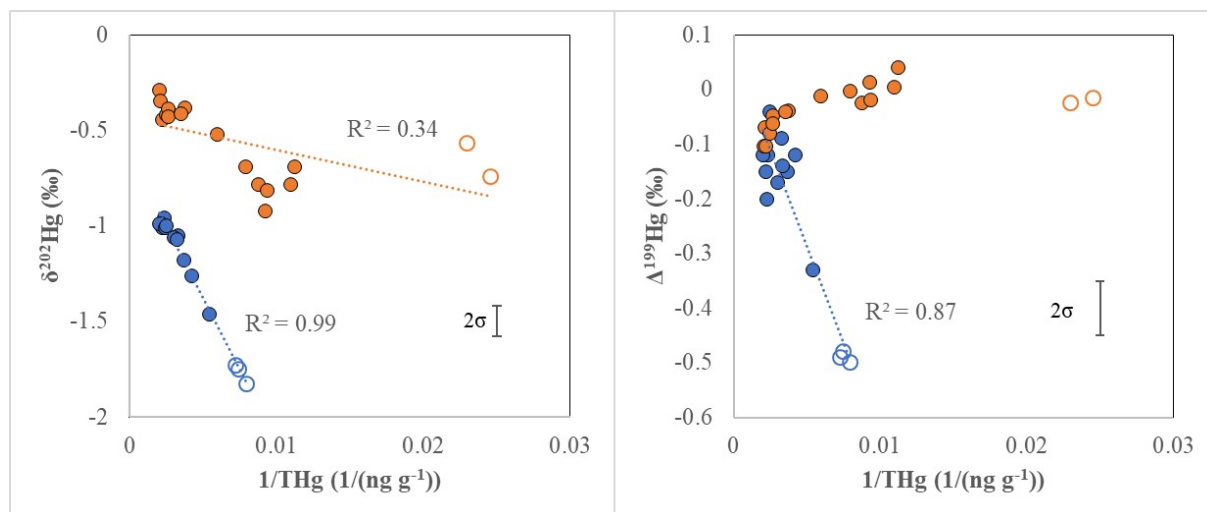

**Figure 7S** Isotope biplot of  $\Delta^{199}\text{Hg}$  vs  $\Delta^{201}\text{Hg}$  for Sargent Mountain Pond, Acadia National Park (ANP) (blue circles) and Long Pond, Cape Cod National Seashore (CCNS) (orange circles) sediments. Open circles denote pre-1850 sediment and closed circles denote post-1850 sediment. Dotted trendlines represent a significant York regression. Brackets show uncertainty in isotope values ( $2\sigma$ ).

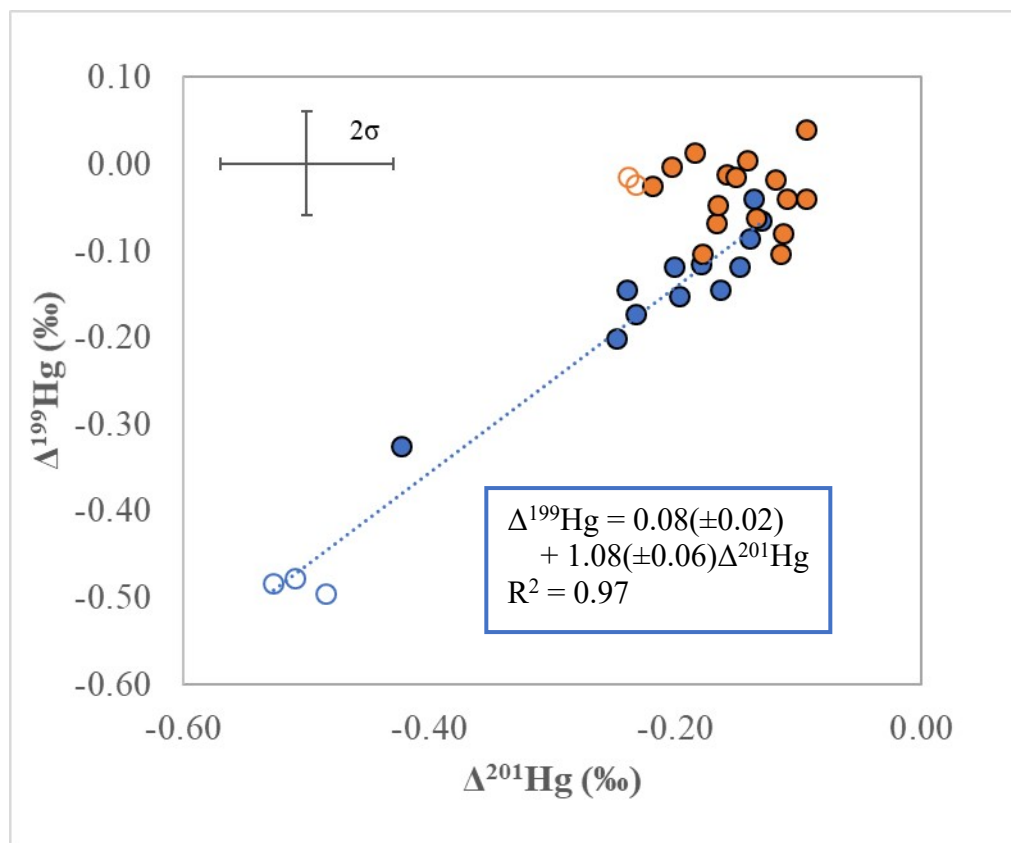

## References:

- 1 P. G. Appleby and F. Oldfield, The calculation of lead-210 dates assuming a constant rate of supply of unsupported 210Pb to the sediment, *CATENA*, 1978, **5**, 1–8.
- 2 M. W. Binford, Calculation and uncertainty analysis of 210Pb dates for PIRLA project lake sediment cores, *J. Paleolimnol.*, 1990, **3**, 253–267.
- 3 J. D. Landis, C. E. Renshaw and J. M. Kaste, Beryllium-7 and lead-210 chronometry of modern soil processes: The Linked Radionuclide aCcumulation model, LRC, *Geochim. Cosmochim. Acta*, 2016, **180**, 109–125.
- 4 U.S. EPA, *U.S. Environmental Protection Agency, 2017 National Emission Inventory (NEI)*. [Available at [www.epa.gov/ttn/chief/net/2017inventory.html](http://www.epa.gov/ttn/chief/net/2017inventory.html), Accessed Feb 2022.], 2020.
